# Supplementary material for: Characterising the clinical associations of hallucinogen persisting perceptual disorder: a retrospective cohort study
Source: Research Square preprint supplement (doi:10.21203/rs.3.rs-6818792/v1), 2025-07-24
Supplement: Supplementary file 1 [file c6c94b445bb76b9f43fc3fc9.docx]

***Supplementary information***

ICD-10 diagnoses used in the composite outcomes.

- Group A (systemic syndromes without established biomarkers, including functional somatic syndromes): functional dyspepsia (K30), irritable bowel syndrome (K58), unspecified contact dermatitis (L25), migraine without aura (G43.0), vascular headache NOS (G44.1), sleep disorder NOS (G47.9), postviral and related fatigue syndromes (G93.3), benign paroxysmal vertigo (H81.1), noninfective gastroenteritis and colitis NOS (K52.9), fibromyalgia (M79.7), chronic pain (G89.2), illness NOS (R69), other general symptoms and signs (R68.8).
- Group B (syndromes with biomarkers or specific established clinical signs): malignant neoplasm of digestive organs (C15-26), type 1 diabetes mellitus (E10), hyperparathyroidism (E21), nonsuppurative otitis media (H65), myocardial infarction (I21), pulmonary embolism (I26), atrial fibrillation (I48), psoriasis (L40), chronic kidney disease (N18), Chron's disease (K50), ulcerative colitis (K51), fissure and fistula of anal and rectal regions (K60), pneumothorax (J93), streptococcus pharyngitis (J02.0).
- Group C (investigations without diagnosis): abnormal findings on examination of blood, without diagnosis (R70-79), abnormal findings on examination of urine, without diagnosis (R80-82), abnormal findings on examination of other body fluids, without diagnosis (R83-89), abnormal findings on diagnostic imaging without diagnosis (R90-94), abnormal blood pressure reading, without diagnosis (R03), person with feared health complaint in whom no diagnosis is made (Z71.1).
- Group D (symptoms recorded without diagnosis): cough (R05), chest pain, unspecified (R07.9), heartburn (R12), other abnormalities of breathing (R06.8), other abdominal pain (R10.8), unspecified abdominal pain (R10.9), flushing (R23.2), other abnormalities of gait and mobility (R26.8), other symptoms and signs involving the nervous and musculoskeletal systems (R29.8), dizziness and giddiness (R42), symptoms and signs involving emotional state (R45), headache (R51), pain NOS (R52), malaise and fatigue (R53), tension headache (G44.2), constipation (K59.0), pruritus NOS (L29.9), low back pain (M54.5).
- Group E (neurodegenerative disorders): Parkinson’s disease (G20), secondary parkinsonism (G21), other degenerative diseases of the basal ganglia (G23), Alzheimer's disease (G30), other degenerative diseases of nervous system, not elsewhere classified (G31), other specified degenerative disorders of the nervous system in diseases classified elsewhere (G32.8)
- Group F (degenerative visual disorders): other retinal disorders (H35), glaucoma (H40), optic neuritis (H46), other disorders of optic [2nd] nerve and visual pathways (H47).
- Group G (psychiatric disorders): alcohol related disorders (F10), opioid related disorders (F11), cannabis related disorders (F12), hypnotic related disorders (F13), cocaine related disorders (F14), stimulant related disorders (F15), inhalant related disorders (F18), depressive episode (F32), bipolar disorder (F31), major depressive disorder (recurrent) (F33), schizophrenia (F20), brief psychotic disorder (F23), schizoaffective disorder (F25), borderline personality disorder (F60.3), adjustment disorder (F43), anxiety disorder unspecified (F41.9), generalised anxiety disorder (F41.1), other specified anxiety disorder (F41.8), post-traumatic stress disorder (F43.1).

|  | ICD-10 code | Psychedelic users | | | Visual disorders | | | Population controls | | |
| --- | --- | --- | --- | --- | --- | --- | --- | --- | --- | --- |
|  |  | **HPPD** | **No HPPD** |  | **HPPD** | **VSS** |  | **HPPD** | **Z00** |  |
|  |  | (%) | (%) | p | (%) | (%) | p | (%) | (%) | p |
| ***Group E – Neurodegenerative Disorders*** | | | | | | | | | |  |
| Parkinson’s Disease | G20 | 0.1 | 0.1 | 0.414 | 0.2 | 0.3 | 0.353 | 0.2 | 0.1 | **0.001** |
| Secondary Parkinsonism | G21 | 0.1 | 0.1 | 0.866 | 0.1 | 0.0 | 0.005 | 0.1 | 0.0 | 0.005 |
| Other degenerative diseases of the basal ganglia | G23 | 0.0 | 0.0 | 1 | 0.0 | 0.0 | 1 | 0.0 | 0.0 | 1 |
| Alzheimer's disease | G30 | 0.0 | 0.0 | 1 | 0.1 | 0.1 | 1 | 0.1 | 0.1 | 0.873 |
| other degenerative diseases of nervous system, not elsewhere classified | G31 | 0.7 | 0.6 | 0.168 | 0.9 | 0.8 | 0.463 | 0.9 | 0.3 | **<0.001** |
| other specified degenerative disorders of the nervous system in diseases classified elsewhere | G32.8 | 0.0 | 0.0 | 0.002 | 0.0 | 0.0 | 1 | 0.0 | 0.0 | 1 |
| ***Group F – Degenerative visual disorders*** | | | | | | | | | |  |
| Other retinal disorders | H35 | 1.0 | 0.6 | **<0.001** | 1.6 | 3.7 | **<0.001** | 1.6 | 0.6 | **<0.001** |
| Glaucoma | H40 | 1.3 | 0.7 | **<0.001** | 1.8 | 3.5 | **<0.001** | 1.8 | 0.8 | **<0.001** |
| Optic neuritis | H46 | 0.2 | 0.1 | **<0.001** | 0.2 | 0.8 | **<0.001** | 0.2 | 0.0 | **<0.001** |
| Other disorders of optic [2nd] nerve and visual pathways | H47 | 0.5 | 0.2 | **<0.001** | 0.6 | 2.2 | **<0.001** | 0.6 | 0.3 | **<0.001** |
| ***Group B – syndromes with biomarkers or specific established clinical signs*** | | | | | | | | | |  |
| Malignant neoplasms of digestive organs | C15-C26 | 0.7 | 0.3 | **<0.001** | 1.1 | 0.7 | **<0.001** | 1.1 | 0.4 | **<0.001** |
| Type 1 diabetes mellitus | E10 | 1.9 | 1.1 | **<0.001** | 2.5 | 2.4 | 0.622 | 2.5 | 0.8 | **<0.001** |
| Nonsuppurative otitis media | H65 | 1.3 | 0.9 | **<0.001** | 1.4 | 2.1 | **<0.001** | 1.4 | 1.1 | **<0.001** |
| Hyperparathyroidism and other disorders of parathyroid gland | E21 | 0.3 | 0.2 | 0.041 | 0.4 | 0.6 | **0.001** | 0.4 | 0.3 | 0.060 |
| Acute myocardial infarction | I21 | 1.9 | 1.6 | 0.005 | 2.6 | 1.6 | **<0.001** | 2.6 | 0.6 | **<0.001** |
| Pulmonary embolism | I26 | 1.2 | 1.1 | 0.080 | 1.5 | 1.2 | 0.039 | 1.5 | 0.5 | **<0.001** |
| Chronic kidney disease (CKD) | N18 | 2.5 | 2.5 | 0.901 | 3.6 | 4.1 | 0.005 | 3.6 | 1.8 | **<0.001** |
| Crohn's disease [regional enteritis] | K50 | 0.5 | 0.3 | 0.004 | 0.6 | 0.5 | 0.578 | 0.6 | 0.3 | **<0.001** |
| Fissure and fistula of anal and rectal regions | K60 | 0.5 | 0.4 | 0.070 | 0.5 | 0.8 | **<0.001** | 0.5 | 0.3 | 0.005 |
| Pneumothorax and air leak | J93 | 0.8 | 0.6 | 0.033 | 1.0 | 0.6 | **<0.001** | 1.0 | 0.3 | **<0.001** |
| Ulcerative colitis | K51 | 0.4 | 0.2 | 0.002 | 0.4 | 0.4 | 0.671 | 0.4 | 0.3 | 0.122 |
| Streptococcal pharyngitis | J02.0 | 2.3 | 1.8 | **0.001** | 2.0 | 2.6 | **<0.001** | 2.0 | 1.5 | **<0.001** |

*Supplementary Table 1: a breakdown of the conditions included in the composite groups odds ratio comparisons.*

|  | RxNorm / VA | Psychedelic users | | | Visual disorders | | | Population controls | | |
| --- | --- | --- | --- | --- | --- | --- | --- | --- | --- | --- |
|  |  | **HPPD** | **No HPPD** | p | **HPPD** | **VSS** | p | **HPPD** | **Z00** | p |
|  |  | (%) | (%) | (%) | (%) | (%) | (%) |
| ***Medications (RxNorm Categorisation)*** | | | | | | | | | |  |
| aripiprazole | 89013 | 4.5 | 5.2 | 1 | 4.4 | 1.6 | **<0.001** | 4.4 | 0.6 | **<0.001** |
| aripiprazole lauroxil | 1673265 | 0.6 | 0.3 | 1 | 0.5 | 0.1 | **<0.001** | 0.5 | 0.0 | **<0.001** |
| asenapine | 784649 | 0.2 | 0.2 | -- | 0.2 | 0.1 | 0.006 | 0.2 | 0.0 | **<0.001** |
| brexpiprazole | 1658314 | 0.1 | 0.1 | 0.56 | 0.2 | 0.1 | 0.022 | 0.2 | 0.0 | **<0.001** |
| cariprazine | 1667655 | 0.2 | 0.3 | -- | 0.2 | 0.1 | 0.006 | 0.2 | 0.0 | **<0.001** |
| chlorpromazine | 2403 | 1.8 | 1.9 | 0.154 | 1.7 | 0.4 | **<0.001** | 1.7 | 0.1 | **<0.001** |
| chlorprothixene | 2406 | 0.0 | 0.0 | 0.313 | 0.0 | 0.0 | -- | 0.0 | 0.0 | -- |
| clozapine | 2626 | 0.3 | 0.3 | **<0.001** | 0.2 | 0.1 | **<0.001** | 0.2 | 0.0 | **<0.001** |
| fluphenazine | 4496 | 0.6 | 0.7 | **<0.001** | 0.6 | 0.1 | **<0.001** | 0.6 | 0.0 | **<0.001** |
| haloperidol | 5093 | 13.8 | 13.6 | 0.898 | 13.2 | 3.6 | **<0.001** | 13.1 | 1.8 | **<0.001** |
| iloperidone | 73178 | 0.0 | 0.1 | 0.002 | 0.0 | 0.0 | 0.67 | 0.0 | 0.0 | **0.001** |
| loxapine | 6475 | 0.1 | 0.1 | **<0.001** | 0.1 | 0.0 | 0.011 | 0.1 | 0.0 | 0.011 |
| lumateperone | 2275602 | 0.0 | 0.0 | -- | 0.0 | 0.0 | 1 | 0.0 | 0.0 | 1 |
| lurasidone | 1040028 | 0.9 | 1.5 | 1 | 0.9 | 0.3 | **<0.001** | 0.9 | 0.1 | **<0.001** |
| molindone | 7019 | 0.0 | 0.0 | 0.361 | 0.0 | 0.0 | 0.002 | 0.0 | 0.0 | 0.002 |
| olanzapine | 61381 | 8.8 | 11.8 | -- | 8.3 | 1.9 | **<0.001** | 8.3 | 0.6 | **<0.001** |
| paliperidone | 679314 | 0.9 | 1.7 | 0.004 | 0.8 | 0.2 | **<0.001** | 0.8 | 0.1 | **<0.001** |
| perphenazine | 8076 | 0.4 | 0.3 | 0.484 | 0.4 | 0.1 | **<0.001** | 0.4 | 0.0 | **<0.001** |
| pimavanserin | 1791685 | 0.0 | 0.0 | **<0.001** | 0.0 | 0.0 | 0.002 | 0.0 | 0.0 | 0.002 |
| quetiapine | 51272 | 10.4 | 9.2 | **<0.001** | 10.2 | 2.7 | **<0.001** | 10.2 | 1.0 | **<0.001** |
| risperidone | 35636 | 7.8 | 7.0 | 0.879 | 7.3 | 1.2 | **<0.001** | 7.3 | 0.5 | **<0.001** |
| thioridazine | 10502 | 0.0 | 0.0 | 1 | 0.1 | 0.0 | 0.532 | 0.1 | 0.0 | 0.532 |
| thiothixene | 10510 | 0.0 | 0.0 | **<0.001** | 0.0 | 0.0 | 1 | 0.1 | 0.0 | 0.414 |
| trifluoperazine | 10800 | 0.0 | 0.0 | 0.002 | 0.1 | 0.0 | 0.414 | 0.0 | 0.0 | -- |
| triflupromazine | 10805 | 0.0 | 0.0 | 0.532 | 0.0 | 0.0 | -- | 0.0 | 0.0 | -- |
| xanomeline | 2694828 | 0.0 | 0.0 | 0.442 | 0.0 | 0.0 | -- | 2.4 | 0.2 | **<0.001** |
| ziprasidone | 115698 | 2.5 | 3.7 | **0.001** | 2.4 | 0.5 | **<0.001** | 4.4 | 0.6 | **<0.001** |
| ***Medications (VA Categorisation)*** | | | | | | | | | |  |
| ANTIPSYCHOTICS | CN700 | 29.9 | 29.2 | 0.140 | 25.6 | 8.2 | **<0.001** | 25.6 | 3.5 | **<0.001** |
| ANTIPSYCHOTICS, OTHER | CN709 | 26.2 | 26.7 | 0.261 | 25.3 | 8.0 | **<0.001** | 25.3 | 3.5 | **<0.001** |
| PHENOTHIAZINE/ RELATED ANTIPSYCHOTICS | CN701 | 2.7 | 2.8 | 0.568 | 2.6 | 0.6 | **<0.001** | 2.6 | 0.2 | **<0.001** |

*Supplementary Table 2: antipsychotic prescribing by cohort (post index diagnosis).*
